# Supplementary material
Source: Springer Nature journal article supplement (https://www.springermedizin.de/resource/supplementary/12884_2012_601_MOESM3_ESM.pdf/9457870)
Supplement: MOESM3 [file 9457870]

Health post

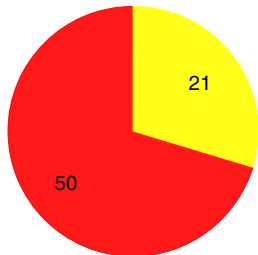

Rural Health centre

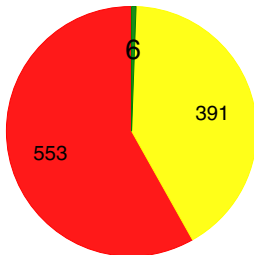

Urban Health centre

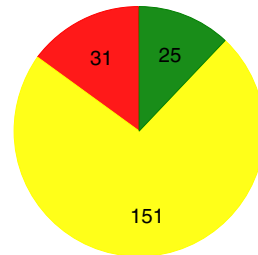

Hospital level 1

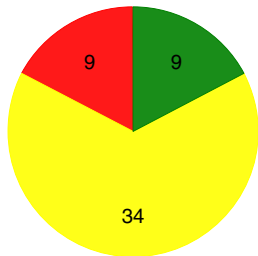

Hospital level2&3

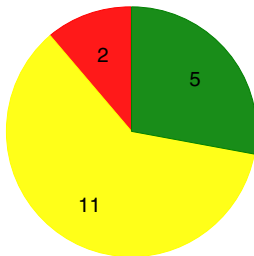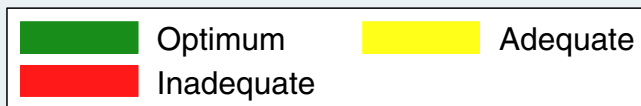

Note: Information on type missing for one facility rated as inadequate
